# Supplementary material
Source: publisher figshare collection journal article supplement (https://diabetesjournals.figshare.com/articles/dataset/_/13549097)
Supplement: Supplementary file 1 [file 1]

**SUPPLEMENTAL E-TABLES**

Supplemental: e-Table 1: Secondary Neurocognitive Outcomes Sub Scores

| Secondary Neurocognitive Outcomes | Group Difference at Age 6 |               |       |       | Group Difference at Age 8 |               |       |       | Group Difference at Age 10 |               |       |       | Group Difference at Age 12 |               |       |       |
|-----------------------------------|---------------------------|---------------|-------|-------|---------------------------|---------------|-------|-------|----------------------------|---------------|-------|-------|----------------------------|---------------|-------|-------|
|                                   | Est.                      | 95% CI        | ES*   | p-val | Est.                      | 95% CI        | ES*   | p-val | Est.                       | 95% CI        | ES*   | p-val | Est.                       | 95% CI        | ES*   | p-val |
| <b>Vocabulary</b>                 | -0.66                     | (-1.34,0.01)  | -0.24 | 0.053 | -0.71                     | (-1.26,-0.16) | -0.31 | 0.011 | -0.76                      | (-1.27,-0.25) | -0.36 | 0.003 | -0.81                      | (-1.37,-0.24) | -0.34 | 0.006 |
| <b>Matrix Reasoning</b>           | -0.84                     | (-1.59,-0.09) | -0.27 | 0.029 | -0.65                     | (-1.24,-0.06) | -0.27 | 0.030 | -0.47                      | (-0.94,0.01)  | -0.24 | 0.054 | -0.28                      | (-0.74,0.17)  | -0.15 | 0.220 |
| <b>Similarity</b>                 | -0.63                     | (-1.24,-0.02) | -0.25 | 0.043 | -0.60                     | (-1.12,-0.08) | -0.28 | 0.023 | -0.57                      | (-1.06,-0.07) | -0.28 | 0.024 | -0.54                      | (-1.08,0.01)  | -0.24 | 0.056 |
| <b>Block Design</b>               | -0.47                     | (-1.24,0.31)  | -0.14 | 0.240 | -0.34                     | (-1.04,0.35)  | -0.12 | 0.332 | -0.22                      | (-0.90,0.46)  | -0.08 | 0.524 | -0.10                      | (-0.83,0.64)  | -0.03 | 0.794 |
| <b>CPT2 Commissions</b>           | 1.85                      | (-0.62,4.32)  | 0.18  | 0.142 | 1.84                      | (-0.19,3.87)  | 0.22  | 0.075 | 1.84                       | (-0.28,3.95)  | 0.21  | 0.088 | 1.83                       | (-0.84,4.50)  | 0.17  | 0.179 |
| <b>CPT2 Detectability</b>         | 1.10                      | (-1.37,3.56)  | 0.11  | 0.383 | 1.05                      | (-0.94,3.04)  | 0.13  | 0.301 | 1.00                       | (-1.00,3.00)  | 0.12  | 0.327 | 0.95                       | (-1.54,3.45)  | 0.09  | 0.455 |
| <b>Concept Formation</b>          | -3.88                     | (-7.19,-0.56) | -0.28 | 0.022 | -3.45                     | (-6.26,-0.64) | -0.30 | 0.016 | -3.03                      | (-5.61,-0.45) | -0.28 | 0.021 | -2.60                      | (-5.30,0.10)  | -0.23 | 0.059 |

\* Effect sizes (Cohen's d) were approximately calculated as 2 times t-value divided by square root of sample size minus one, where t- values were calculated as point estimates of group difference from mixed effects modeling divided by their robust maximum likelihood standard errors.

Supplemental e-Table 2: Results of LME conditional on replacement status

| Primary Outcomes      | Group Difference at Age 6 |                      |              |              | Group Difference at Age 8 |                      |              |              | Group Difference at Age 10 |                       |              |              | Group Difference at Age 12 |                       |              |              |
|-----------------------|---------------------------|----------------------|--------------|--------------|---------------------------|----------------------|--------------|--------------|----------------------------|-----------------------|--------------|--------------|----------------------------|-----------------------|--------------|--------------|
|                       | Estimate                  | 95% CI               | ES*          | p-val        | Estimate                  | 95% CI               | ES*          | p-val        | Estimate                   | 95% CI                | ES*          | p-val        | Estimate                   | 95% CI                | ES*          | p-val        |
| <i>Neurocognitive</i> |                           |                      |              |              |                           |                      |              |              |                            |                       |              |              |                            |                       |              |              |
| FSIQ                  | <b>-4.18</b>              | <b>(-7.41,-0.95)</b> | <b>-0.31</b> | <b>0.011</b> | <b>-3.86</b>              | <b>(-6.73,-0.99)</b> | <b>-0.32</b> | <b>0.008</b> | <b>-3.53</b>               | <b>(-6.28,-0.79)</b>  | <b>-0.31</b> | <b>0.012</b> | <b>-3.21</b>               | <b>(-6.10,-0.32)</b>  | <b>-0.27</b> | <b>0.030</b> |
| PIQ                   | -3.43                     | (-7.30, 0.45)        | -0.21        | 0.083        | -2.73                     | (-6.05, 0.59)        | -0.20        | 0.107        | -2.04                      | (-5.05, 0.97)         | -0.16        | 0.184        | -1.35                      | (-4.36, 1.67)         | -0.11        | 0.383        |
| VIQ                   | <b>-3.82</b>              | <b>(-7.09,-0.54)</b> | <b>-0.28</b> | <b>0.020</b> | <b>-3.89</b>              | <b>(-6.75,-1.03)</b> | <b>-0.33</b> | <b>0.008</b> | <b>-3.96</b>               | <b>(-6.72,-1.20)</b>  | <b>-0.35</b> | <b>0.005</b> | <b>-4.04</b>               | <b>(-7.04,-1.03)</b>  | <b>-0.32</b> | <b>0.009</b> |
| <i>Structural MRI</i> |                           |                      |              |              |                           |                      |              |              |                            |                       |              |              |                            |                       |              |              |
| Total brain volume    | -15524                    | (-35588, 4541)       | -0.18        | 0.129        | <b>-21322</b>             | <b>(-41790,-854)</b> | <b>-0.25</b> | <b>0.041</b> | <b>-25727</b>              | <b>(-46808,-4646)</b> | <b>-0.29</b> | <b>0.017</b> | <b>-28738</b>              | <b>(-50224,-7252)</b> | <b>-0.32</b> | <b>0.009</b> |
| Gray matter           | -8637                     | (-20596, 3323)       | -0.17        | 0.157        | <b>-11987</b>             | <b>(-23905, -70)</b> | <b>-0.24</b> | <b>0.049</b> | <b>-14542</b>              | <b>(-26798,-2286)</b> | <b>-0.28</b> | <b>0.020</b> | <b>-16300</b>              | <b>(-28744,-3856)</b> | <b>-0.31</b> | <b>0.010</b> |
| White matter          | -6263                     | (-15766, 3241)       | -0.16        | 0.196        | -8381                     | (-18183, 1421)       | -0.20        | 0.094        | <b>-10368</b>              | <b>(-20609,-128)</b>  | <b>-0.24</b> | <b>0.047</b> | <b>-12225</b>              | <b>(-22786,-1664)</b> | <b>-0.28</b> | <b>0.023</b> |

\* Effect sizes (Cohen's d) were approximately calculated as 2 times t-value divided by square root of sample size minus one, where t-values were calculated as point estimates of group difference from mixed effects modeling divided by their robust maximum likelihood standard errors.

| Supplemental e-Table 3 Correlations between Brain and Neurocognitive Scores in T1D and Control Groups<br>(longitudinal mixed effect modeling) |                                  |                                 |                                 |                                 |
|-----------------------------------------------------------------------------------------------------------------------------------------------|----------------------------------|---------------------------------|---------------------------------|---------------------------------|
| Age                                                                                                                                           | 6 years                          | 8 years                         | 10 years                        | 12 years                        |
| <b>Total Brain Volume</b>                                                                                                                     |                                  |                                 |                                 |                                 |
| Diabetes                                                                                                                                      |                                  |                                 |                                 |                                 |
| FSIQ                                                                                                                                          | 0.245 (0.086)<br><b>P=0.004</b>  | 0.272 (0.074)<br><b>P=0.000</b> | 0.283 (0.070)<br><b>P=0.000</b> | 0.277 (0.075)<br><b>P=0.000</b> |
| PIQ                                                                                                                                           | 0.339 (0.085)<br><b>P=0.000</b>  | 0.347 (0.075)<br><b>P=0.000</b> | 0.347 (0.072)<br><b>P=0.000</b> | 0.336 (0.078)<br><b>P=0.000</b> |
| VIQ                                                                                                                                           | 0.043 (0.087)<br><b>P=0.004</b>  | 0.090 (0.078)<br>P=0.246        | 0.133 (0.076)<br>0.081          | 0.166 (0.085)<br>P=0.052        |
| Control                                                                                                                                       |                                  |                                 |                                 |                                 |
| FSIQ                                                                                                                                          | 0.407 (0.125)<br><b>P=-0.001</b> | 0.397 (0.117)<br><b>P=0.001</b> | 0.374 (0.118)<br><b>P=0.002</b> | 0.345 (0.123)<br><b>P=0.005</b> |
| PIQ                                                                                                                                           | 0.282 (0.148)<br>P=0.057         | 0.311 (0.137)<br>P=0.024        | 0.325 (0.128)<br><b>P=0.011</b> | 0.323 (0.120)<br><b>P=0.007</b> |
| VIQ                                                                                                                                           | 0.418 (0.114)<br><b>P=0.000</b>  | 0.377 (0.104)<br><b>P=0.000</b> | 0.332 (0.116)<br><b>P=0.004</b> | 0.290 (0.136)<br><b>P=0.033</b> |
| <b>Gray Matter Volume</b>                                                                                                                     |                                  |                                 |                                 |                                 |
| Diabetes                                                                                                                                      |                                  |                                 |                                 |                                 |
| FSIQ                                                                                                                                          | 0.225 (0.081)<br><b>P=0.006</b>  | 0.266 (0.070)<br><b>P=0.000</b> | 0.286 (0.068)<br><b>P=0.000</b> | 0.285 (0.076)<br><b>P=0.000</b> |
| PIQ                                                                                                                                           | 0.314 (0.086)<br><b>P=0.000</b>  | 0.336 (0.073)<br><b>P=0.000</b> | 0.348 (0.071)<br><b>P=0.000</b> | 0.347 (0.078)<br><b>P=0.000</b> |
| VIQ                                                                                                                                           | 0.043 (0.083)<br>P=0.605         | 0.094 (0.074)<br>P=0.205        | 0.137 (0.075)<br>P=0.069        | 0.166 (0.088)<br>P=0.061        |
| Control                                                                                                                                       |                                  |                                 |                                 |                                 |
| FSIQ                                                                                                                                          | 0.367 (0.125)<br><b>P=0.003</b>  | 0.375 (0.112)<br><b>P=0.001</b> | 0.365 (0.112)<br><b>P=0.001</b> | 0.032 (0.12)<br><b>P=0.004</b>  |
| PIQ                                                                                                                                           | 0.247 (0.144)<br>P=0.086         | 0.294 (0.132)<br><b>P=0.026</b> | 0.321 (0.126)<br><b>P=0.011</b> | 0.325 (0.121)<br><b>P=0.007</b> |
| VIQ                                                                                                                                           | 0.402 (0.129)<br><b>P=0.002</b>  | 0.368 (0.111)<br><b>P=0.001</b> | 0.329 (0.114)<br><b>P=0.004</b> | 0.290 (0.130)<br><b>P=0.026</b> |
| <b>White Matter Volume</b>                                                                                                                    |                                  |                                 |                                 |                                 |

|          |                                 |                                 |                                 |                                 |
|----------|---------------------------------|---------------------------------|---------------------------------|---------------------------------|
| Diabetes |                                 |                                 |                                 |                                 |
| FSIQ     | 0.249 (0.094)<br><b>P=0.008</b> | 0.258 (0.083)<br><b>P=0.002</b> | 0.257 (0.077)<br><b>P=0.001</b> | 0.243 (0.078)<br>P=-0.002       |
| PIQ      | 0.342 (0.086)<br><b>P=0.008</b> | 0.333 (0.079)<br><b>P=0.000</b> | 0.319 (0.077)<br><b>P=0.000</b> | 0.294 (0.082)<br><b>P=0.000</b> |
| VIQ      | 0.040 (0.096)<br>P=0.667        | 0.078 (0.086)<br>P=0.365        | 0.117 (0.082)<br>P=0.154        | 0.149 (0.086)<br>P=0.084        |
| Control  |                                 |                                 |                                 |                                 |
| FSIQ     | 0.398 (0.136)<br><b>P=0.003</b> | 0.372 (0.126)<br><b>P=0.003</b> | 0.342 (0.124)<br><b>P=0.006</b> | 0.309 (0.127)<br><b>P=0.015</b> |
| PIQ      | 0.282 (0.155)<br>P=0.069        | 0.291 (0.140)<br><b>P=0.037</b> | 0.293 (0.127)<br><b>P=0.021</b> | 0.286 (0.118)<br><b>P=0.015</b> |
| VIQ      | 0.380 (0.114)<br><b>P=0.001</b> | 0.338 (0.106)<br><b>P=0.001</b> | 0.297 (0.122)<br><b>P=0.015</b> | 0.256 (0.145)<br>P=0.077        |
