# Supplementary material
Source: publisher figshare collection journal article supplement (https://diabetesjournals.figshare.com/articles/dataset/_/13549097)
Supplement: Supplementary file 2 [file 1]

**Supplemental Figure S1: Patient Study Flow**

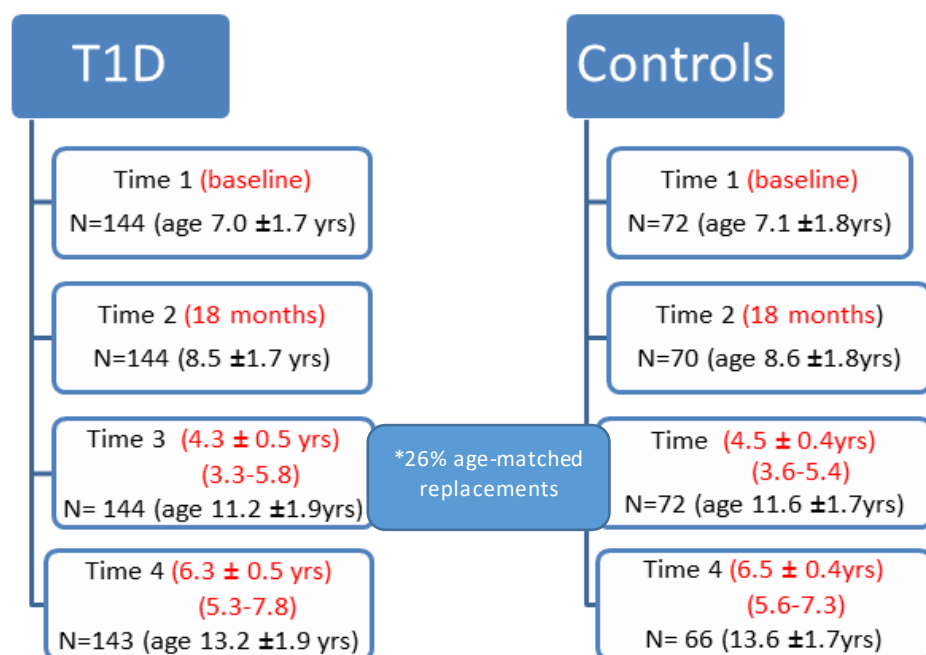

Legend: In red is the study time relative to baseline, for Time 3 and Time 4 (range)
