# Supplementary material
Source: publisher figshare collection journal article supplement (https://diabetesjournals.figshare.com/articles/dataset/_/13549097)
Supplement: Supplementary file 3 [file 1]

## ON LINE APPENDIX

**The Diabetes Research in Children Network (DirecNet):** The participating centers, study Principal Investigators, clinical site principal investigators (site PIs), co-investigators (Is), and coordinators (Cs) members of the steering committee are as follows: Nemours Children’s Health System, Jacksonville, FL: Nelly Mauras, MD (**Principal Investigator**), Larry A. Fox, MD (I), Allison Cato, PhD (I), Kim Englert, RN, BSN, CDE (project manager), Kaitlin Sikes, ARNP, MSN (C), and Keisha Bird, DNP, APRN (C); Imaging Data Coordinating Center, Stanford University, Stanford, CA: Allan L. Reiss, MD (**Co-Principal Investigator**), Lara Foland-Ross, PhD (I), Matthew J. Marzelli, MS (I), Paul K. Mazaika, PhD (I), Booil Jo (I), Gabby Tong, BA (C); Department of Pediatrics, University of Iowa Carver College of Medicine, Iowa City, IA: Eva Tsalikian, MD (site PI), Michael J. Tansey, MD (I), Julie Coffey, MSN (C), and Rachel Bisbee (C); Division of Pediatric Endocrinology and Diabetes, Stanford University School of Medicine, Stanford, CA: Bruce A. Buckingham, MD (site PI), Darrell M. Wilson, MD (I), Tandy Aye, MD (I), and Ryan S. Kingman, BS (C); Department of Pediatrics, Yale University School of Medicine, New Haven, CT: Stuart A. Weinzimer, MD (site PI), William V. Tamborlane, MD (I), Jodie Ambrosino, PhD (I), Amy Steffen, BS (C), Kate Weyman, MSN (C); Washington University, St. Louis, MO: Neil H. White, MD, CDE (site PI), Ana Maria Arbelaez, MD (I), Lucy Levandoski, PA-C (C), and Tamara Hershey, PhD (I).
